# Supplementary material for: Inter-species geographic signatures for tracing horizontal gene transfer and long-term persistence of carbapenem resistance
Source: PubMed Central journal article supplement (PMC8981930; doi:10.1186/s13073-022-01040-y), 2022-04-05
Supplement: 13073_2022_1040_MOESM2_ESM.pdf [file 13073_2022_1040_MOESM2_ESM.pdf]

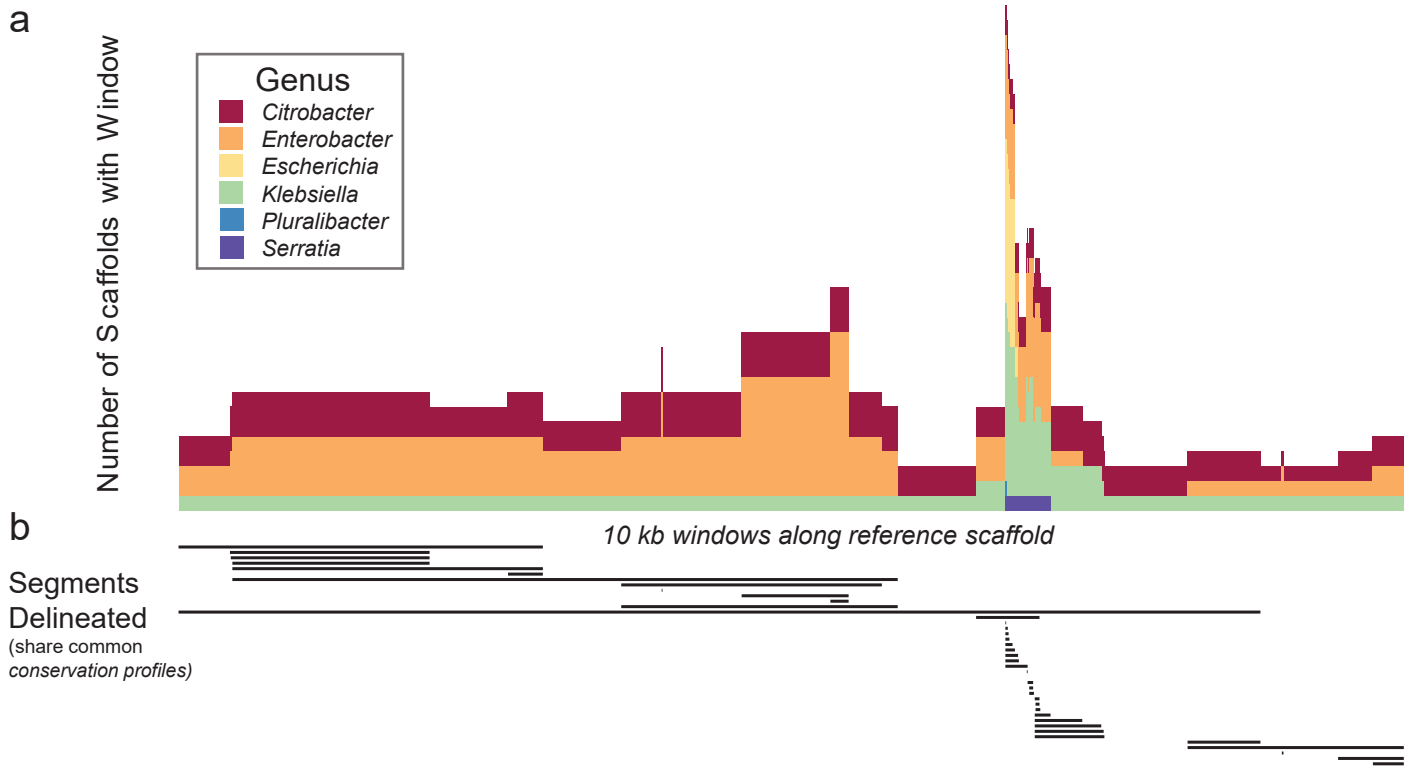

**Fig S1: Method for the delineation of segments shared between plasmids.** *ConSequences* identifies the boundaries of conserved segments spanning multiple 10 kb windows which can be found across multiple (> 2) isolates through assessment of conservation profiles across adjacent windows along reference scaffolds. a, Each bar depicts a 10 kb window highlighted by sliding window analysis as being conserved in multiple scaffolds. These bars are ordered along the reference scaffold positionally (x-axis) and the height of bars corresponds to the number of scaffolds in our isolate assemblies that have a highly similar match ( $\geq 99\%$ ) to the 10 kb sequence on the reference (colored by genus). b, Using a custom algorithm (Materials and Methods), segments  $\geq 10$  kb were delineated along the reference scaffold based on conservation profiles across multiple adjacent windows.

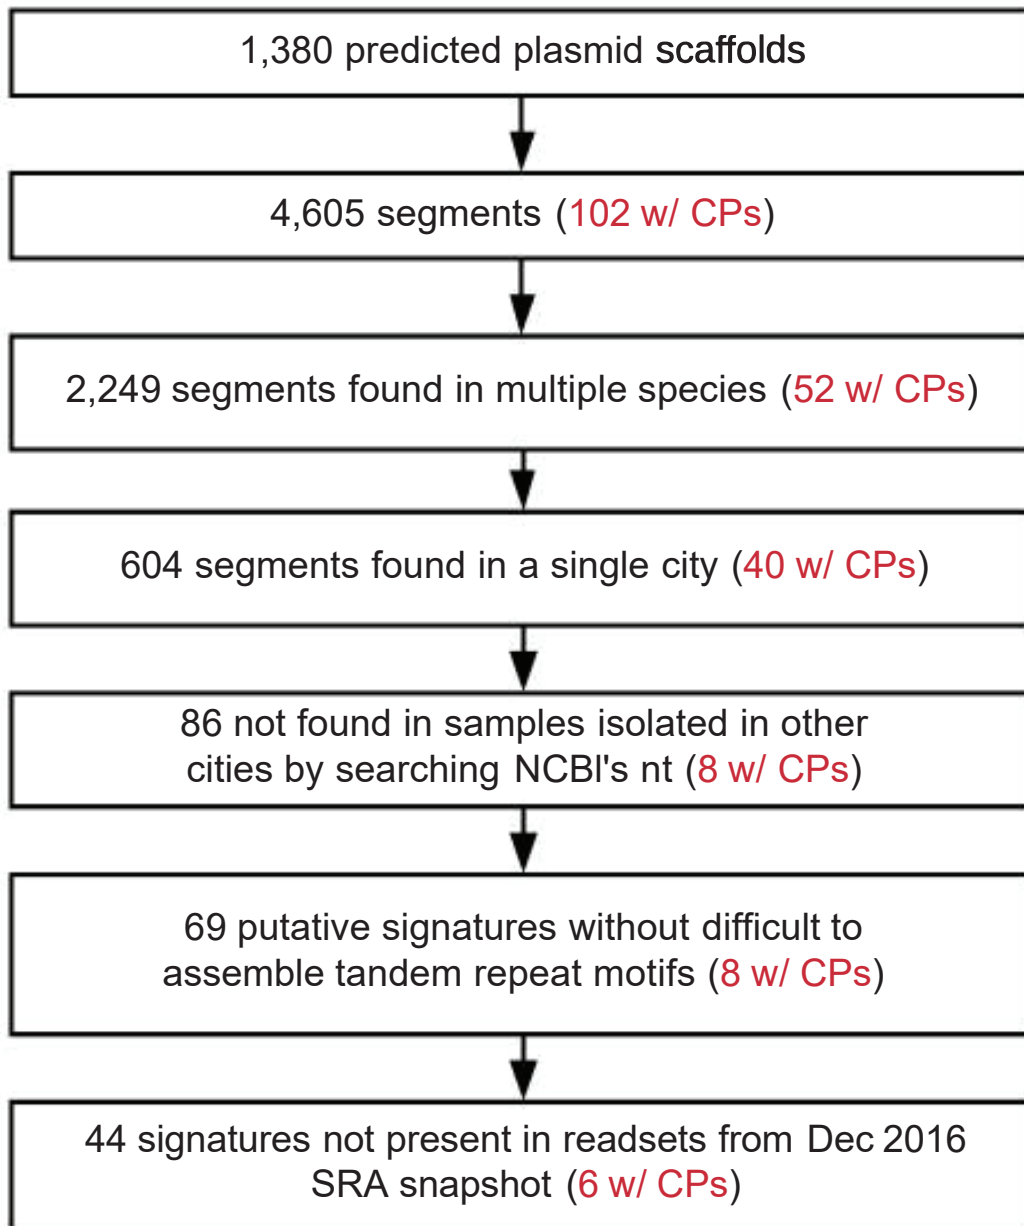

**Fig. S2: Workflow to identify geographic signatures.** The number of plasmid segments that were retained after sequentially applying different filters to identify 44 geographic signatures is shown (Materials and Methods). The number of plasmid segments carrying carbapenemases (CPs) is provided in red.

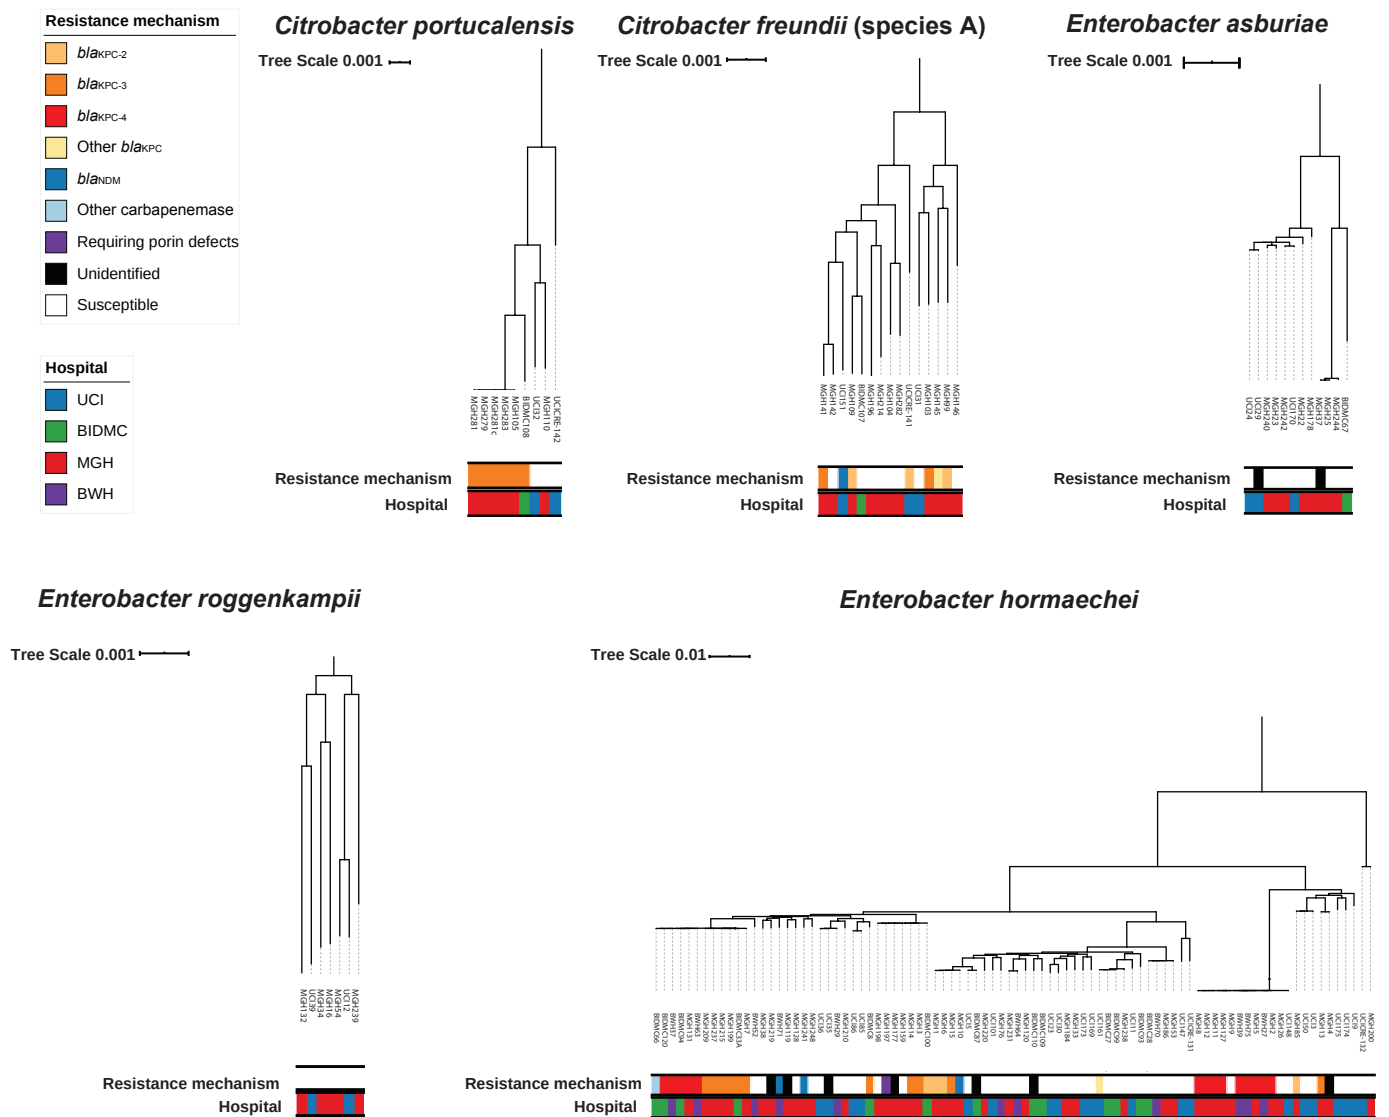

**Fig. S3: Phylogenetic tree for each of the 15 species in our collection with at least five representatives.** Below the phylogenies, colored strips indicate resistance mechanisms and hospital of isolation for each isolate. MGH: Massachusetts General Hospital, Boston, MA; UCI: University of California, Irvine, CA; BIDMC: Beth Israel Deaconess Medical Center, Boston, MA; BWH: Brigham and Women’s Hospital, Boston, MA.

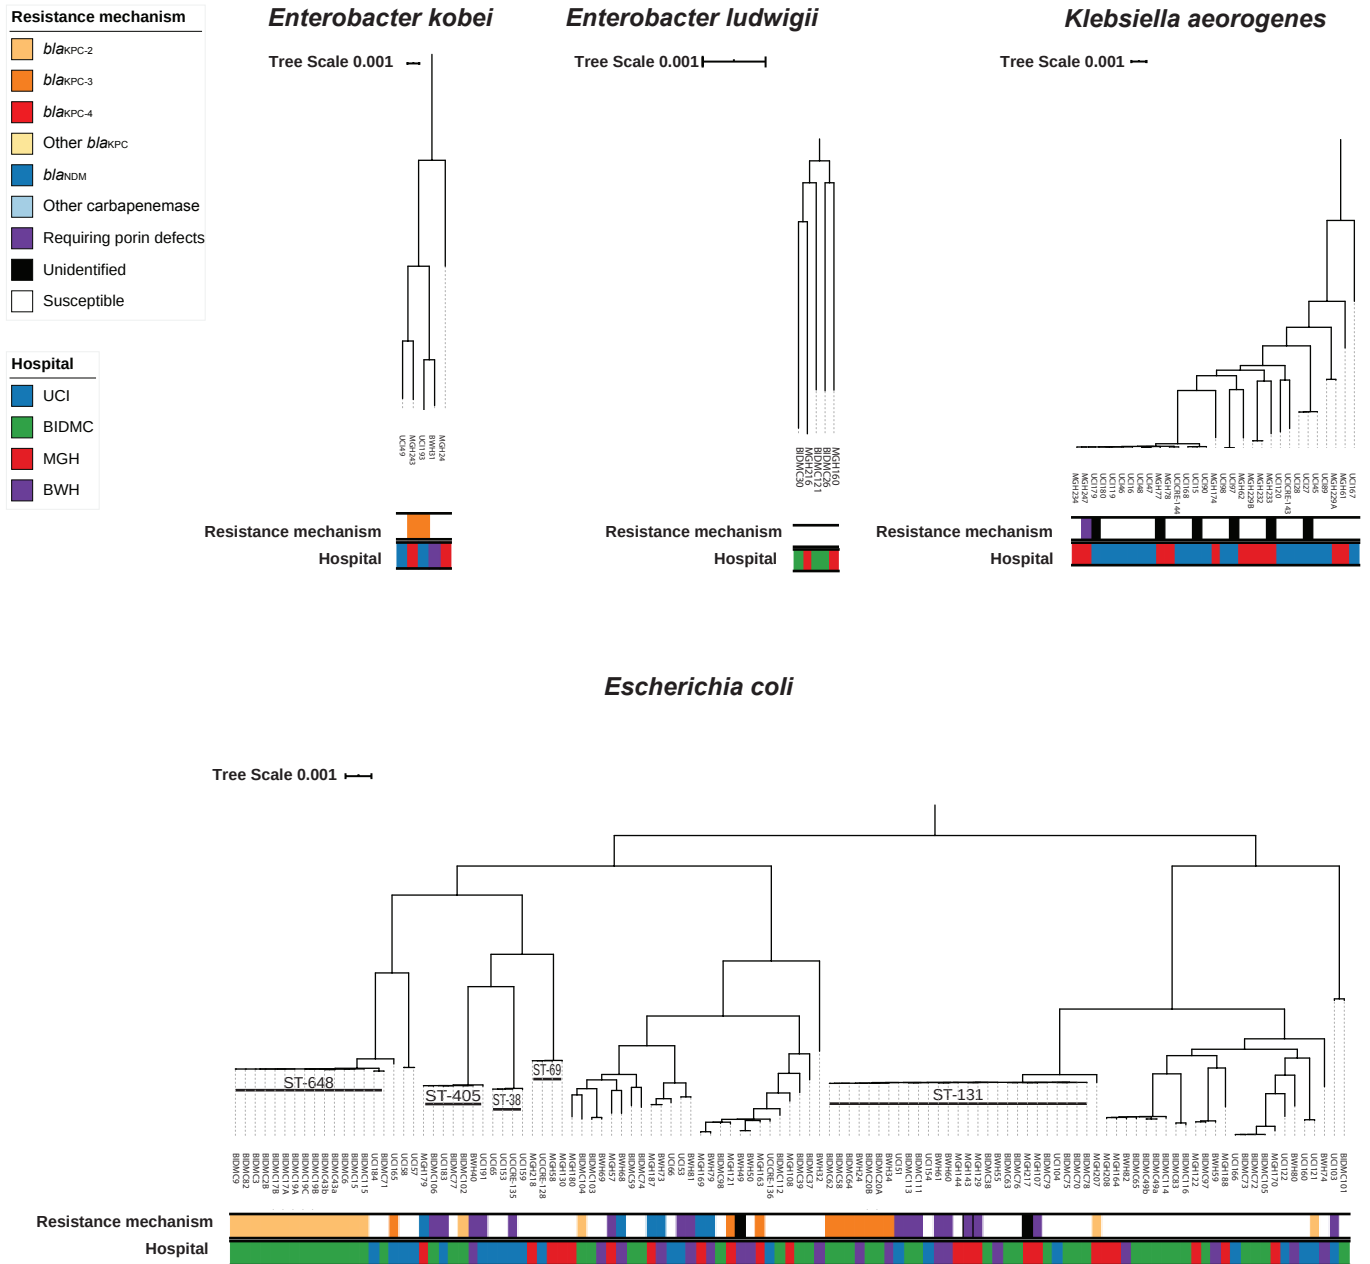

**Fig. S3: Phylogenetic tree for each of the 15 species in our collection with at least five representatives. *Continued.***



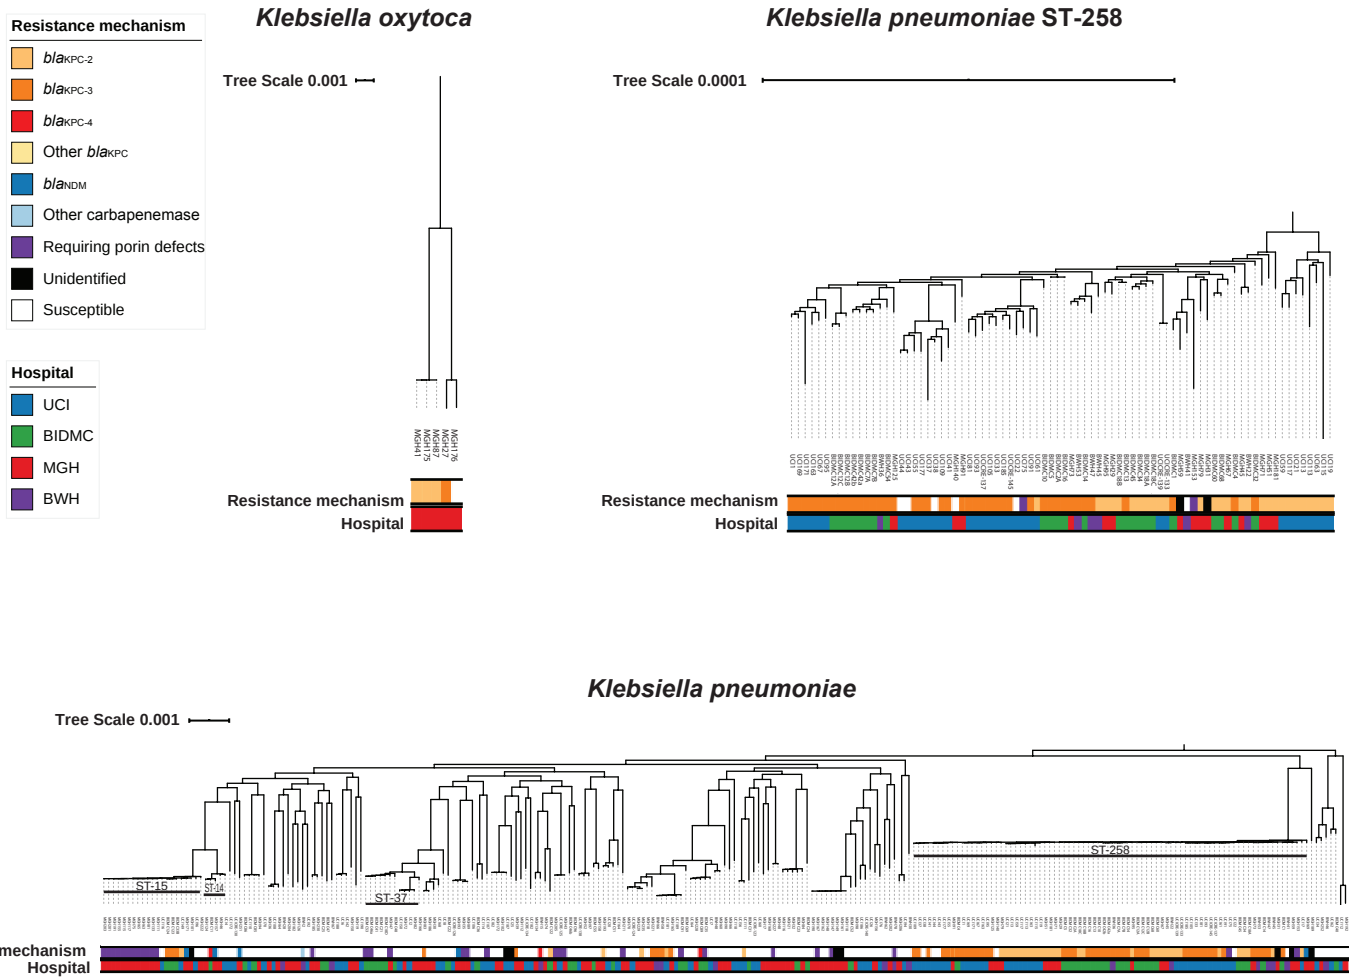

**Fig. S3: Phylogenetic tree for each of the 15 species in our collection with at least five representatives. *Continued.***

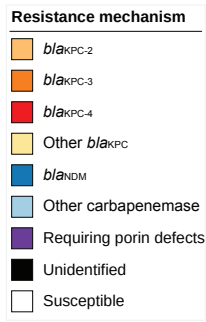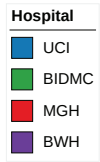

***Klebsiella quasipneumoniae***

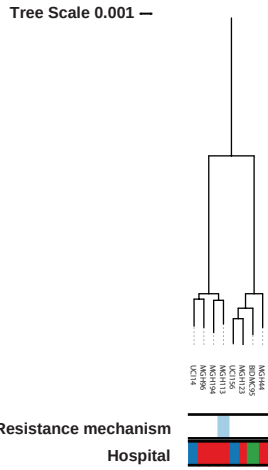

***Klebsiella variicola***

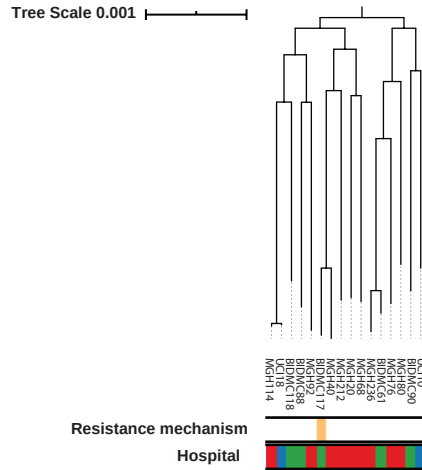

***Serratia marcescens***

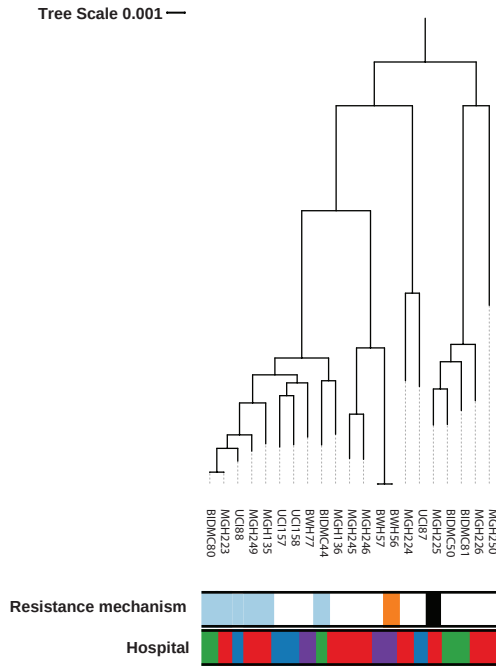

**Fig. S3: Phylogenetic tree for each of the 15 species in our collection with at least five representatives. *Continued.***

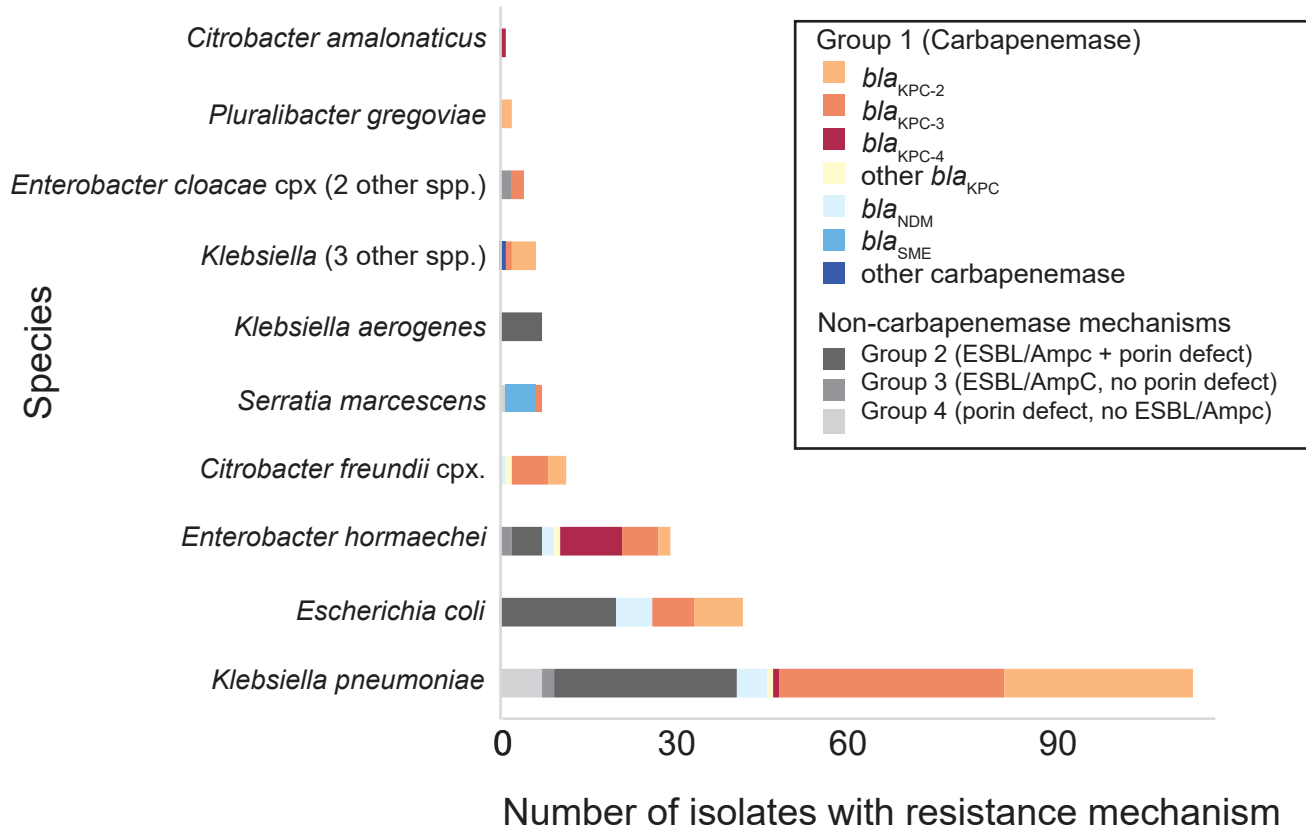

**Fig. S4: Resistance mechanisms were diverse, with many shared across species.** The numbers of resistant isolates by resistance mechanism (different colors) are depicted by species.

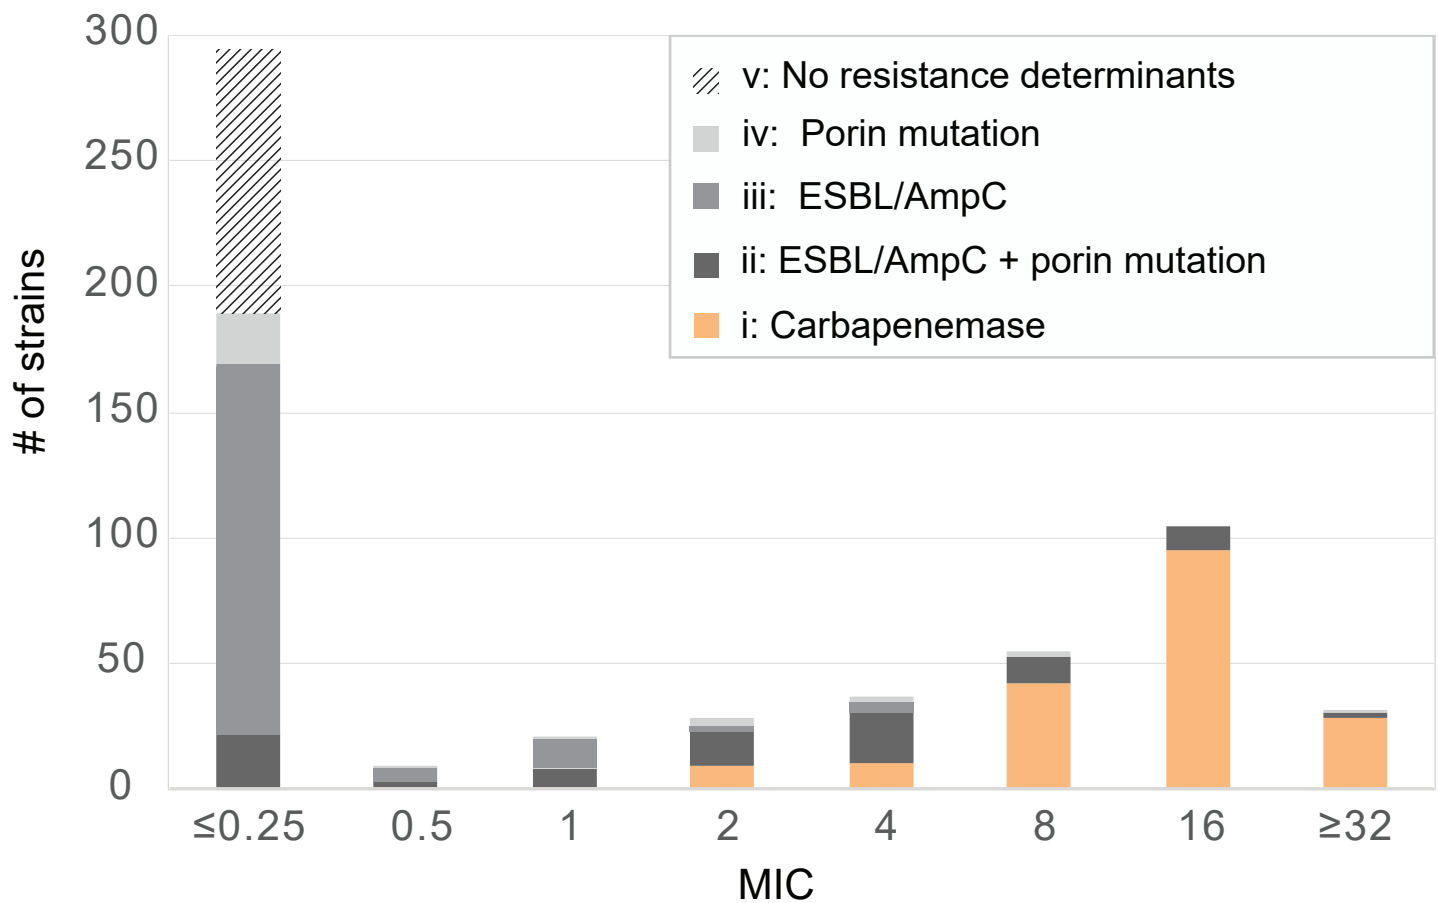

**Fig. S5: Carbapenemase-carrying isolates tended to have a higher minimum inhibitory concentration than those with other resistance mechanisms.** Minimum inhibitory concentrations (MICs) of the isolates in our collection are depicted, stratified by mechanism of resistance (different colors).

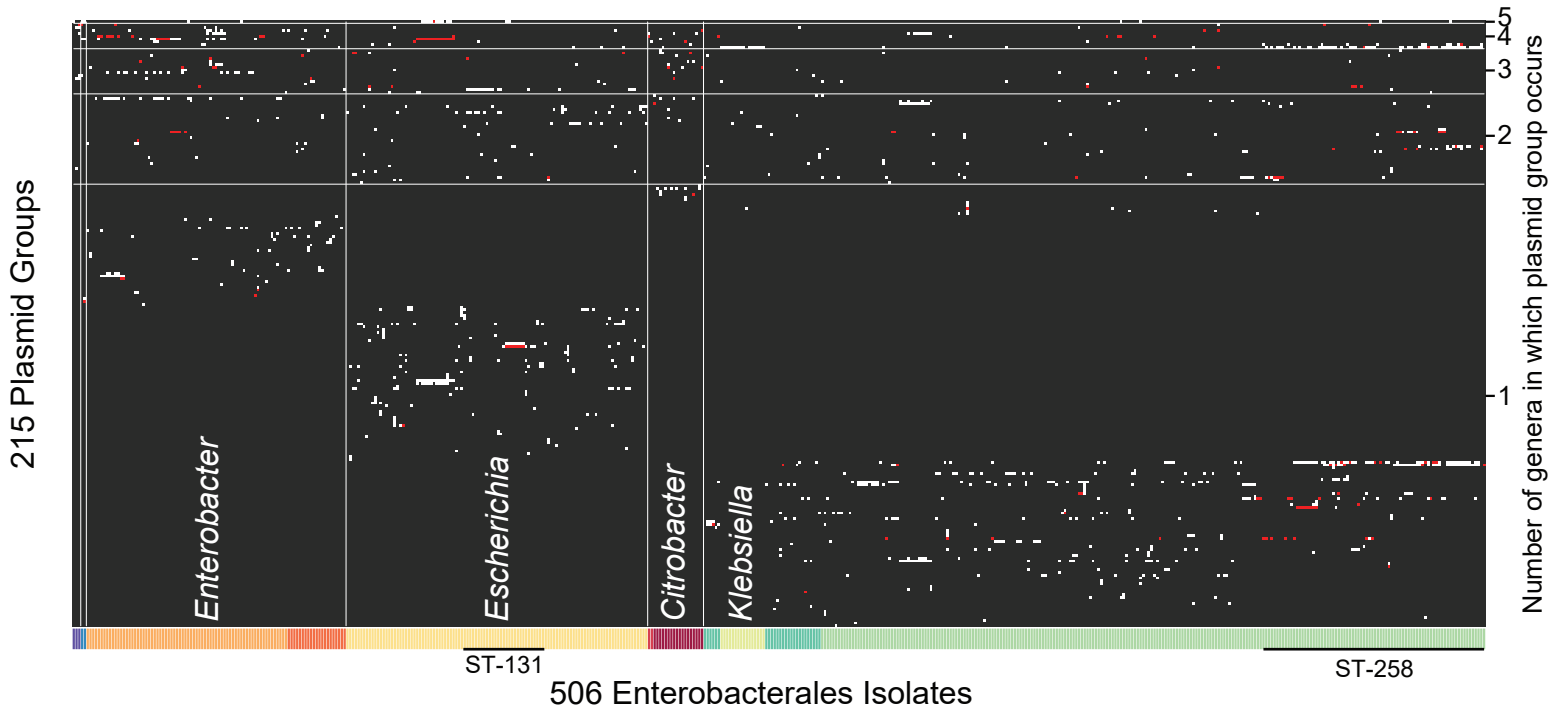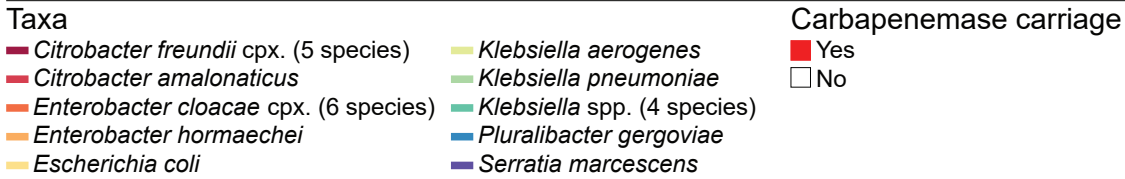

**Fig. S6: High level of diversity and phylogenetic range among predicted plasmids.** This plot displays the 215 plasmid groups (rows) contained in all 506 isolates (columns) for which plasmids were predicted. Plasmids with carbapenemases are indicated in red, and plasmids without carbapenemases are indicated in white. Isolates are ordered phylogenetically, while the plasmid groups are ordered by the number of genera in which they occurred and clustered.

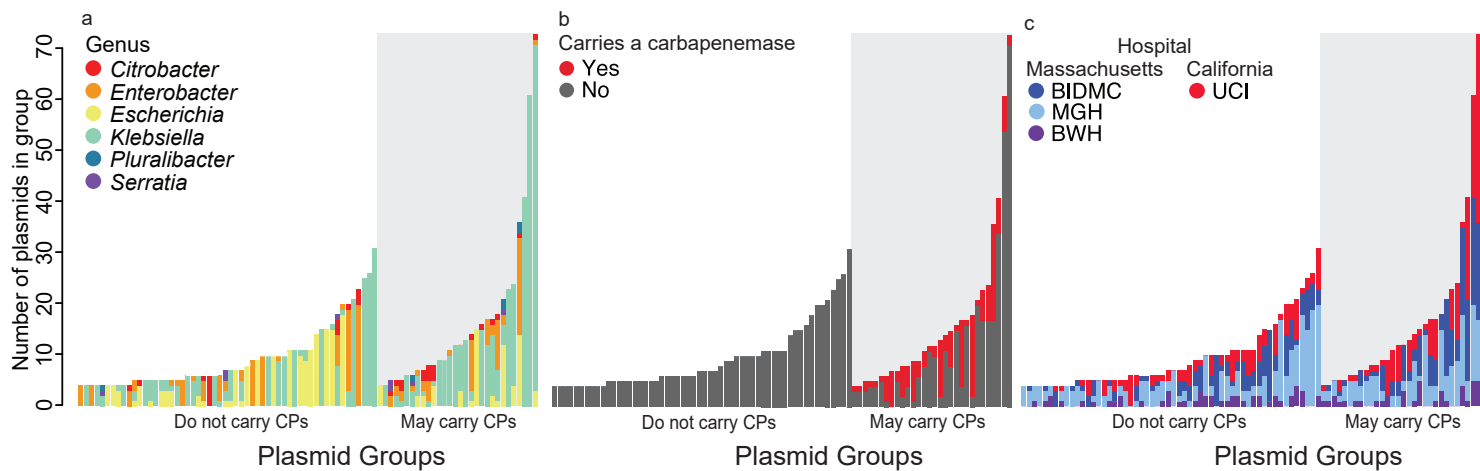

**Fig. S7: Plasmids of diverse groups carried carbapenemases and were found in different species, and hospitals.** The number of plasmids from groups for which we found at least four instances is shown. Groups with plasmids that carry carbapenemases (CPs) are depicted on a grey background, while those not observed to carry carbapenemases are shown on a white background. a, Plasmid instances colored by carbapenemase carriage. b, Plasmid instances colored by genus. c, Plasmid groups colored by hospital of origin.

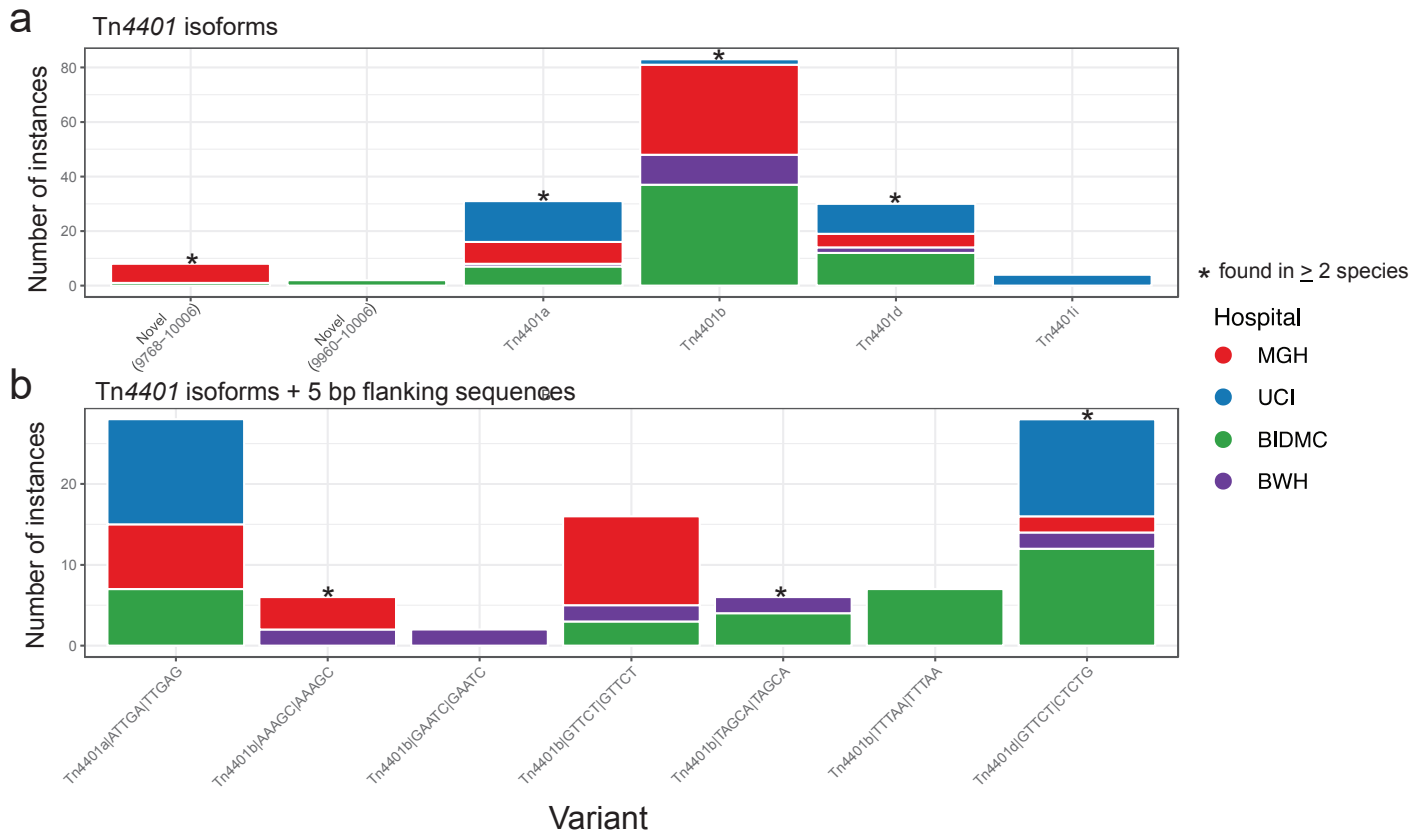

**Fig. S8: Limited tracing of carbapenemase localized spread using Tn4401 isoforms and their immediate flanking sequences.** a, Number of instances for Tn4401 isoforms; and b, combinations of the three most common Tn4401 isoforms with their 5 bp flanking sequences which were found in multiple isolates from our study. Colors indicate the proportion of instances found in each of the four hospitals. The asterisk indicates forms that were found in multiple species.

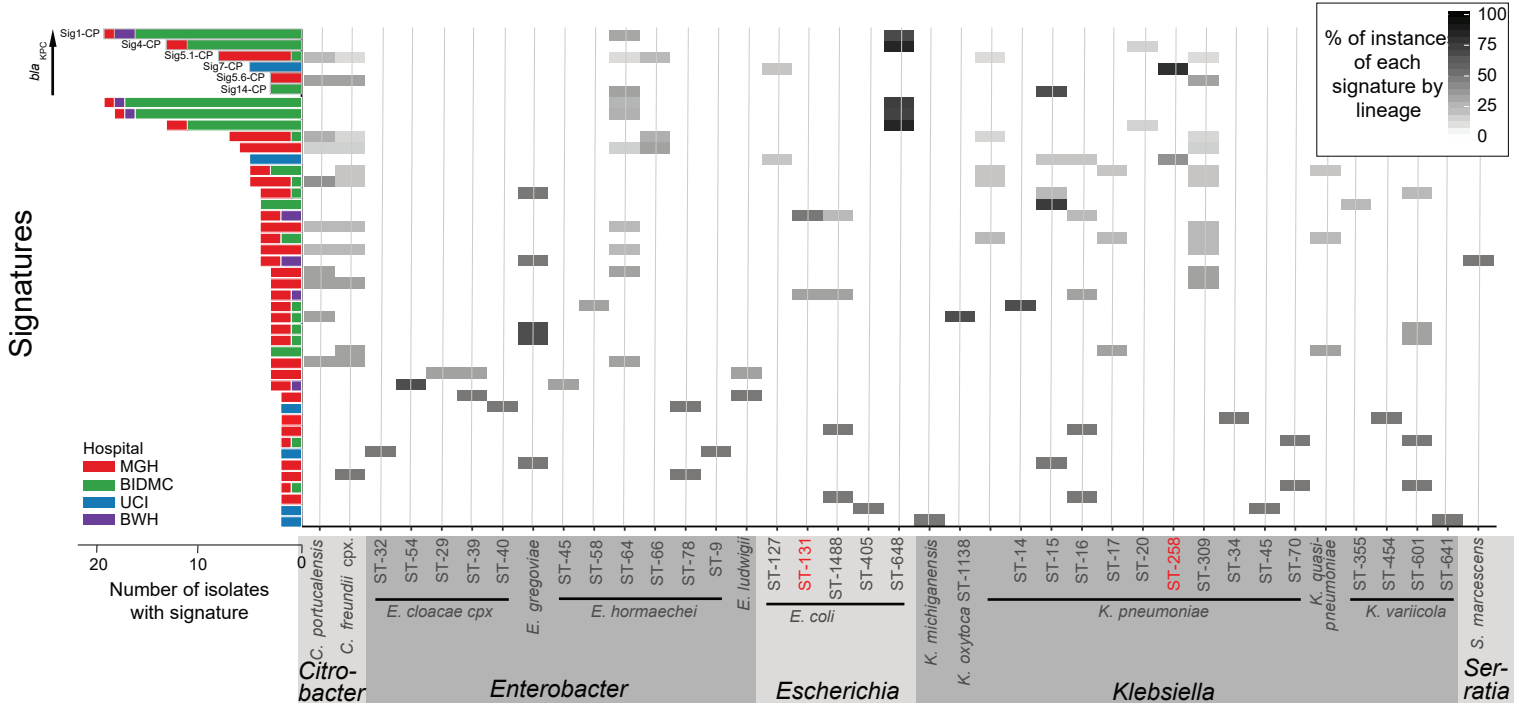

**Fig. S9: Signatures were present across diverse sequence types.** In this heatmap, each row corresponds to a unique signature, and each column corresponds to a sequence type (ST). The shading represents the percentage of signature instances belonging to different taxonomic lineages, species or ST. The bar plot to the left of the heatmap depicts the number of isolates containing each signature, highlighting their prevalence across different hospitals.



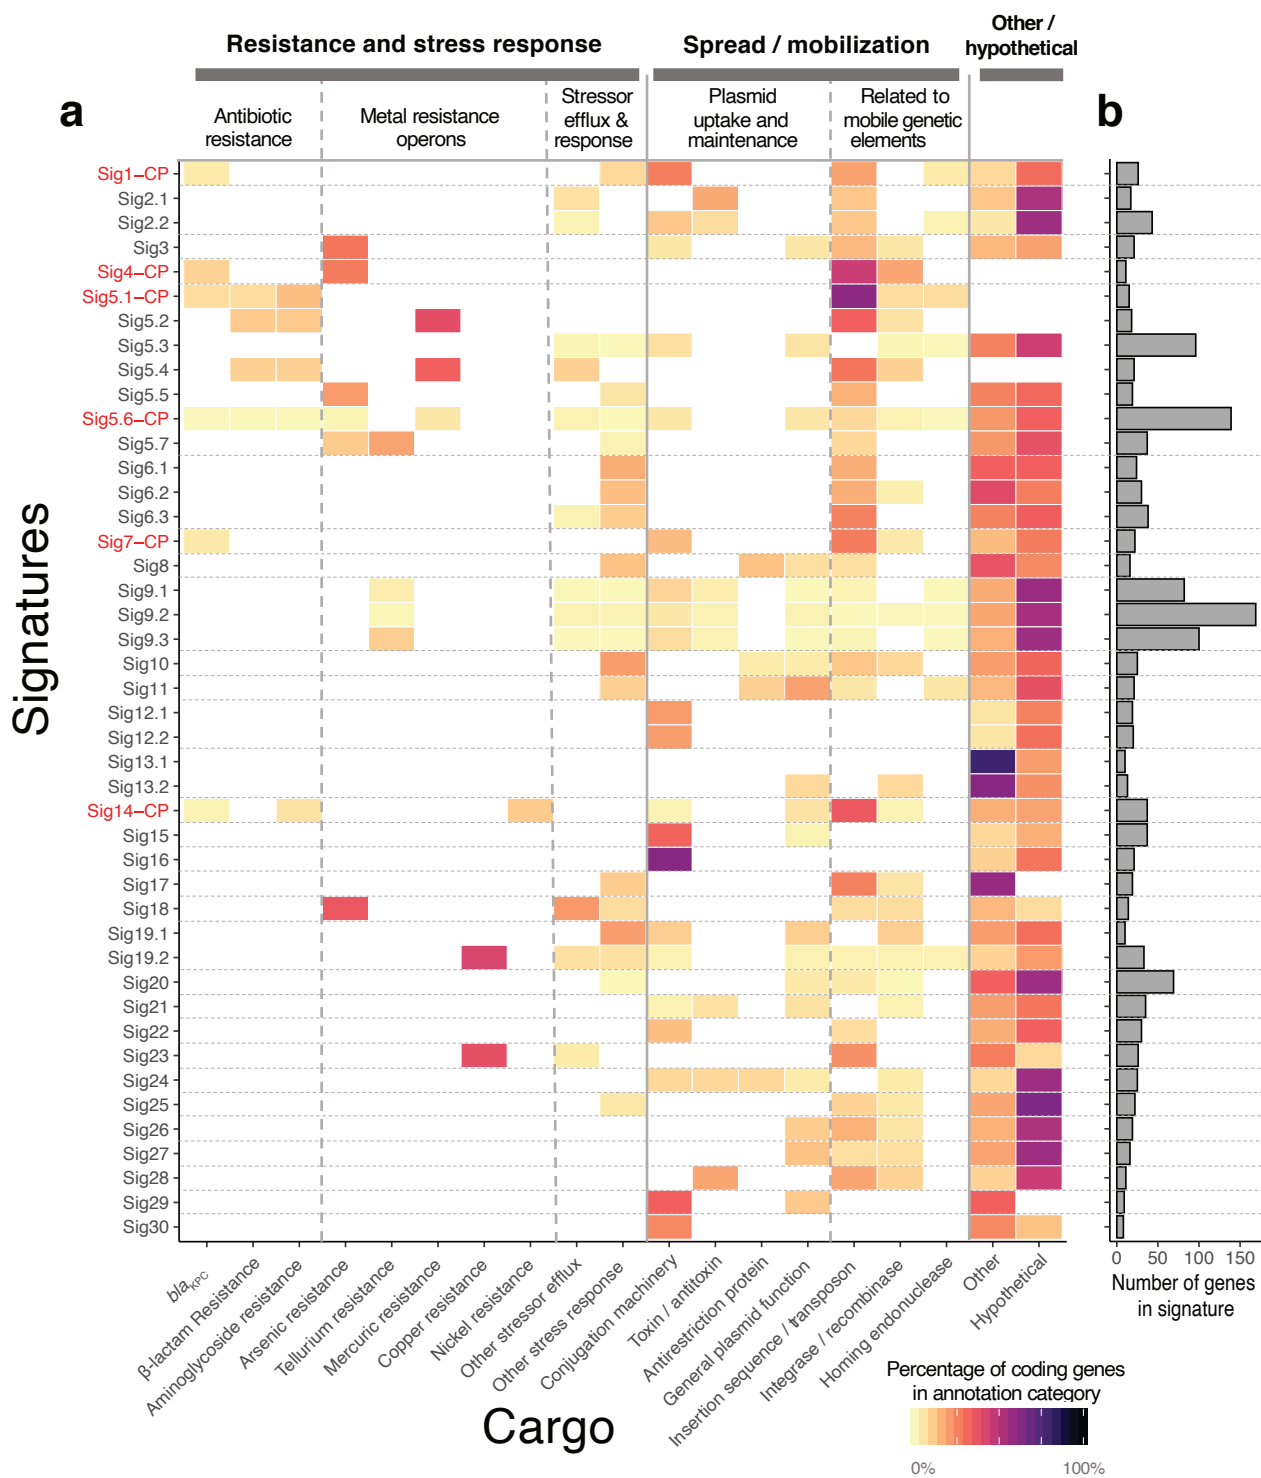

**Fig. S10: Signatures carried genes important for hospital adaptation and signature mobility.**  
 a, Each row in the heatmap corresponds to one of the 44 geographic signatures. Groups of signatures that nest into each other are separated by horizontal dashed lines. The predicted functions of 1,494 genes within our 44 signatures were categorized into five major functional categories, unless they fell outside of these categories (other) or no gene function could be predicted (hypothetical). The coloring of the heatmap indicates the percentage of genes of each signature that are assigned to a particular category. The identifiers of carbapenemase-carrying signatures are shown in red type and suffixed with -CP. b. Number of genes in each signature.

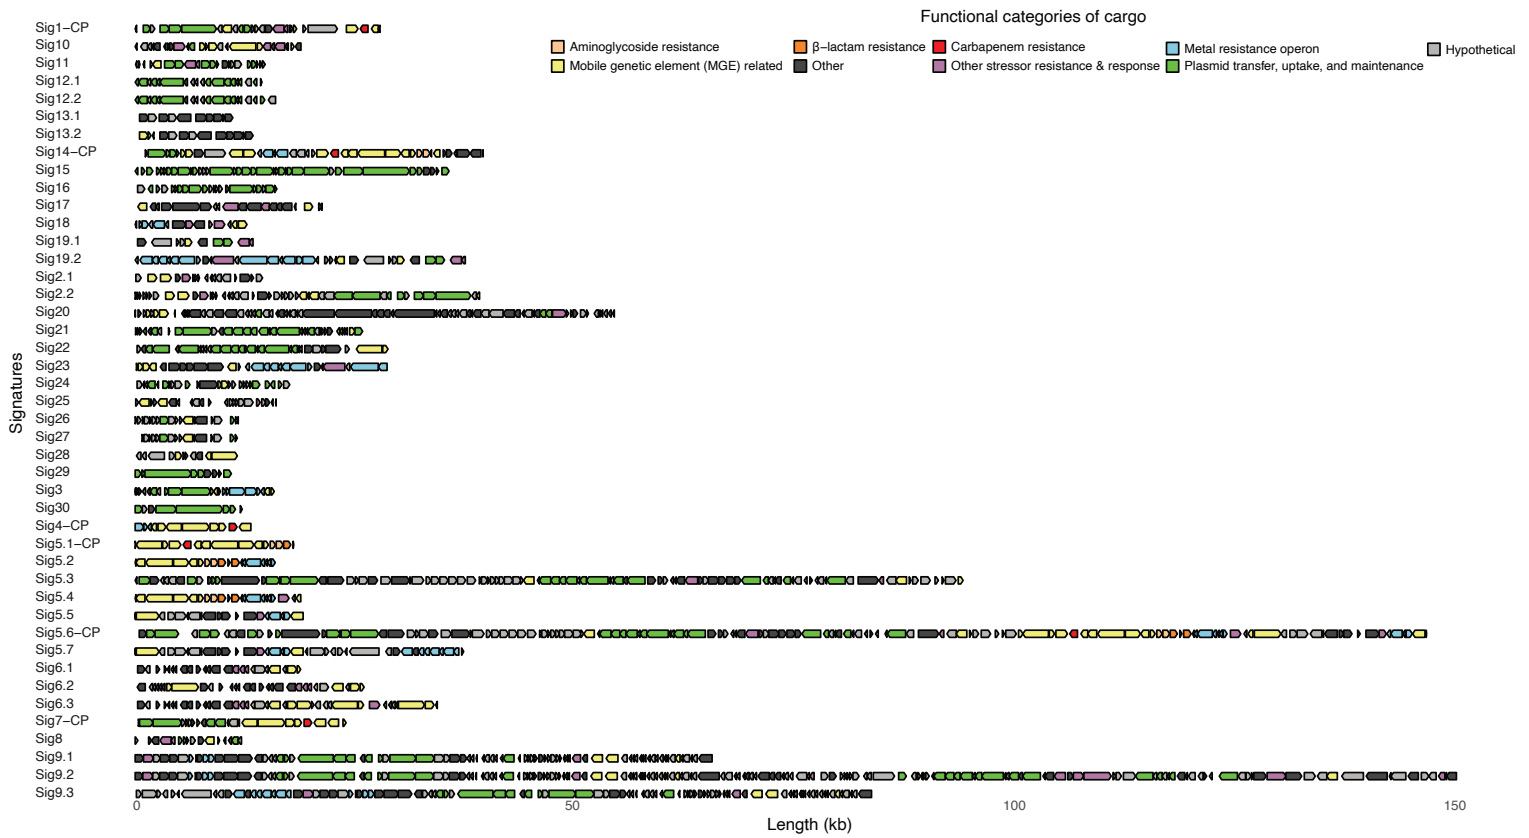

**Fig. S11: Details of signature content.** Schematics are shown for the gene content of each signature, including the five with *bla*<sub>KPC</sub>. Genes are colored according to broad functional categorizations (Materials and Methods).

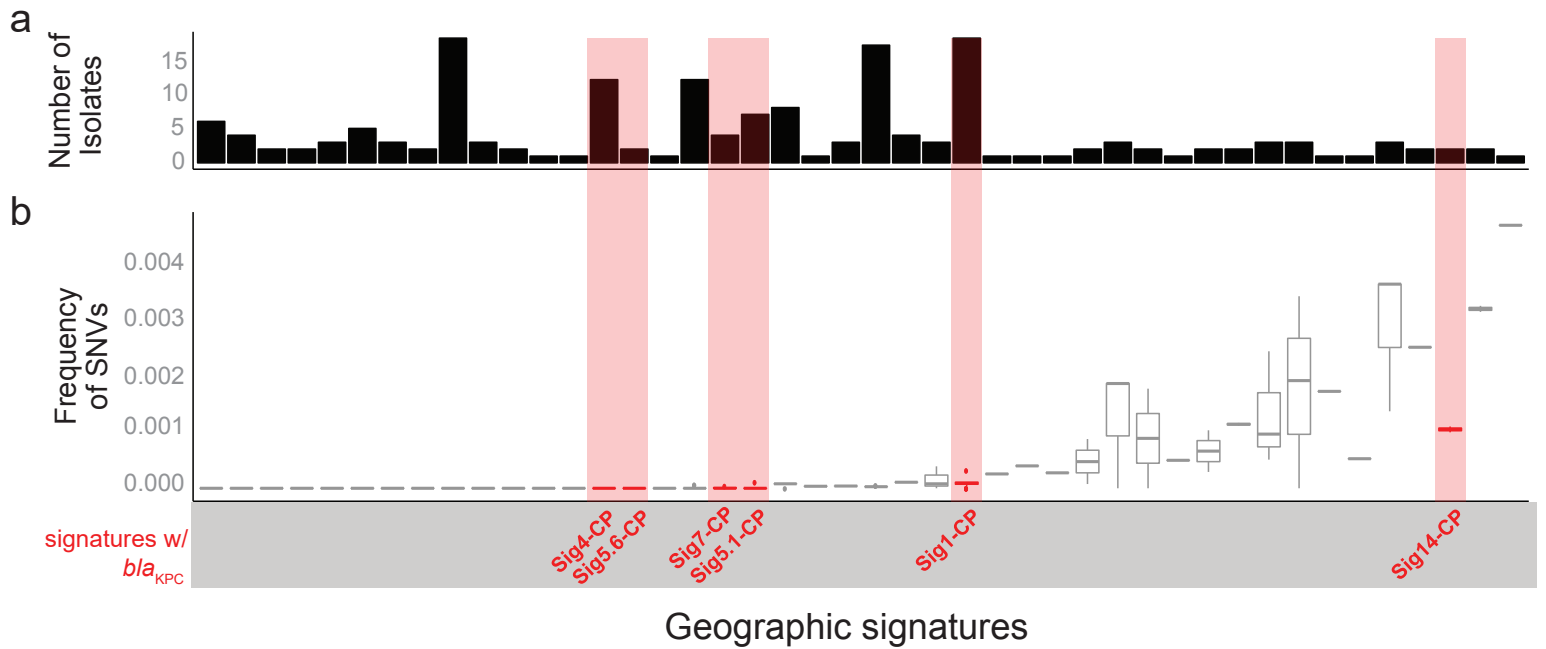

**Fig. S12: Signatures were highly conserved and likely derived from a common ancestral sequence.** The number of confident, unambiguous single nucleotide variants (SNVs) differentiating signature instances was calculated for each of the 44 geographic signatures, through comparison of each instance to the signature's representative sequence using Pilon [98]. a, Number of isolates carrying each signature. b, Box plot of SNV frequencies. SNV frequencies were calculated by normalizing the count of SNVs between each signature instance and the reference sequence (c) with the signature's length.

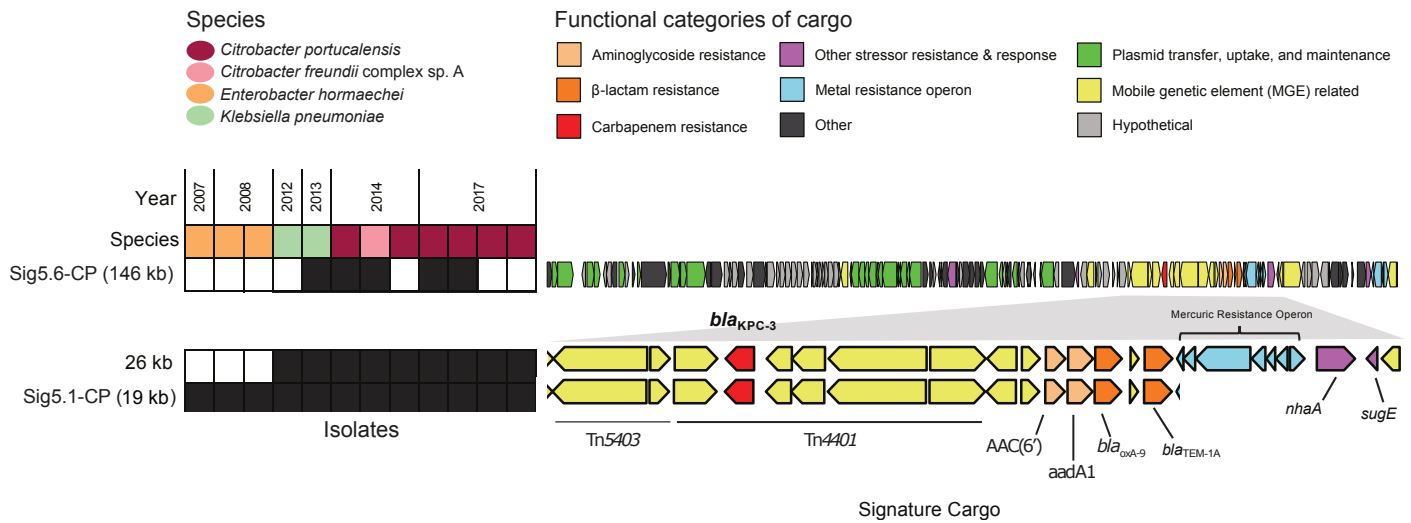

**Fig. S13: Geographic signatures with *bla<sub>KPC</sub>* can occur in multiple configurations across several species and plasmid groups.** The heatmap on the left indicates the presence of signatures Sig5.6-CP and Sig5.1-CP, and the alternate boundaries of the latter, across the twelve isolates found to harbor the signature(s). The gene content of each signature is shown on the right.

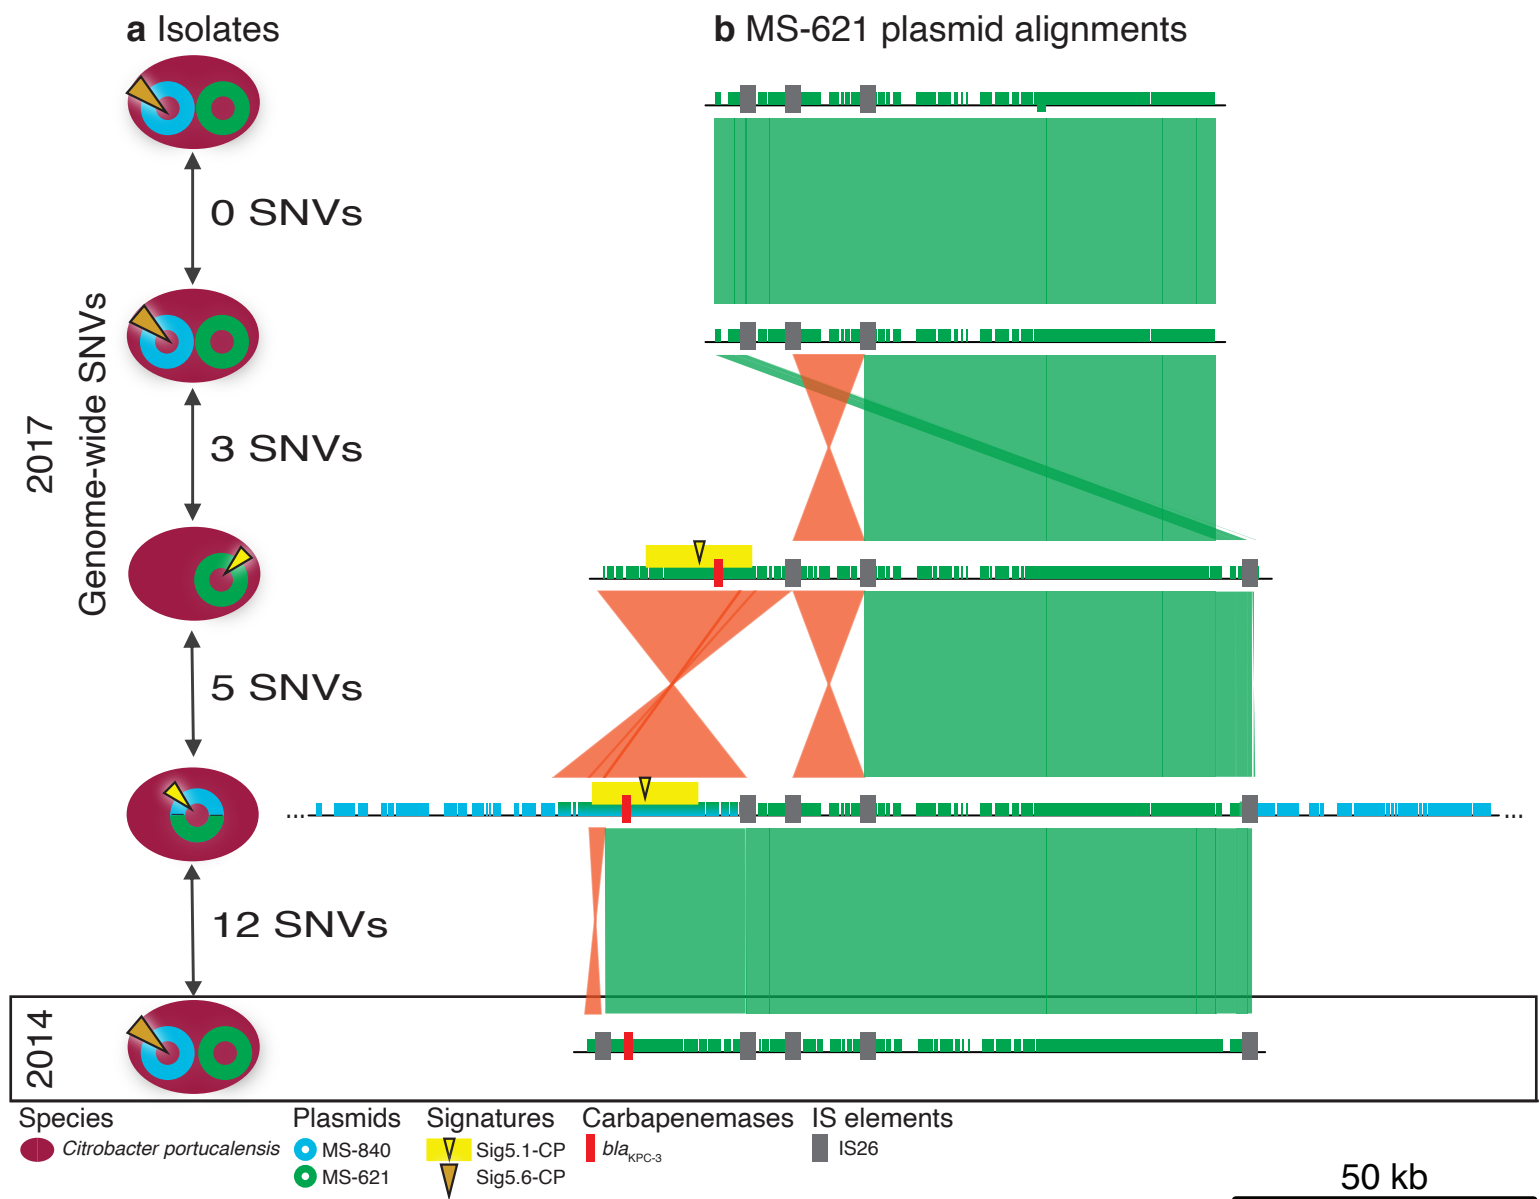

**Fig. S14: Geographic signatures with  $bla_{KPC}$  occurred in multiple configurations across several species and plasmid groups.** a, The core genome single-nucleotide variants (SNVs) and plasmid and geographic signature carriage of five nearly identical *Citrobacter portucalensis* isolates is shown. b, Alignment of the MS-621 plasmids carried by all isolates a. Two of these plasmids carry Sig5.1-CP, indicated with the bright yellow bars and triangles. The locations of the  $bla_{KPC}$  and of insertion sequence IS26 are indicated with red and grey rectangles, respectively. Inversions in the alignment are indicated with orange connector lines; matching regions are indicated with green connector lines. In one isolate, plasmids MS-840 and MS-621 co-integrated, which is indicated by blue alignment flanks.
